# Supplementary material for: Associations between Dietary Patterns and Bile Acids—Results from a Cross-Sectional Study in Vegans and Omnivores
Source: MDPI journal article supplement (doi:10.3390/nu12010047), 2019-12-23
Supplement: s1 [file s1]

# **Associations between dietary patterns and bile acids – results from a cross-sectional study in vegans and omnivores**

**Iris Trefflich<sup>1,4\*</sup>, Hanns-Ulrich Marschall<sup>2</sup>, Romina di Giuseppe<sup>3</sup>, Marcus Ståhlman<sup>2</sup>, Andreas Michalsen<sup>4</sup>, Alfonso Lampen<sup>1</sup>, Klaus Abraham<sup>1</sup> and Cornelia Weikert<sup>1,4</sup>**

<sup>1</sup>German Federal Institute for Risk Assessment, Department of Food Safety, Berlin, Germany;

<sup>2</sup>University of Gothenburg, Department of Molecular and Clinical Medicine, Sweden

<sup>3</sup> Romina di Giuseppe, Institute for Epidemiology, University Kiel, Germany

<sup>4</sup>Institute for Social Medicine, Epidemiology and Health Economics, Charité-University Medicine, Berlin

\* Correspondence: iris.trefflich@bfr.bund.de

**Supplemental material**

**Supplemental Figure S1: Study flow chart**

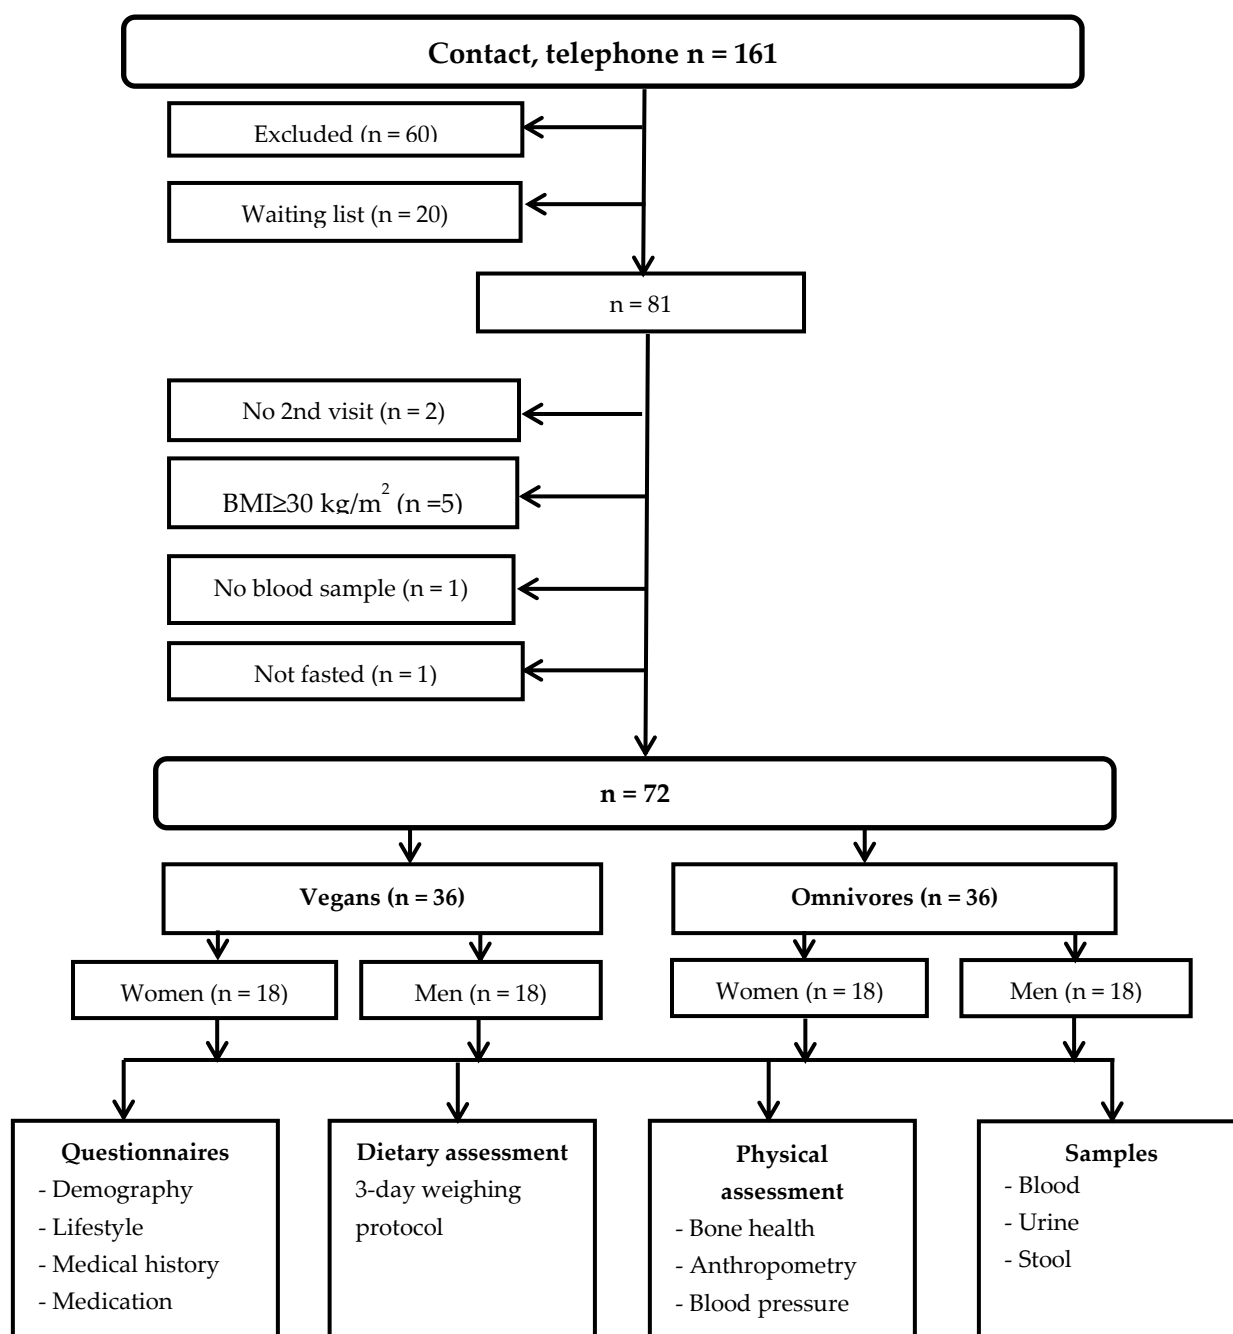

**Supplemental Table S1:** Yielding factors for prepared food items

| <b>Food items</b>                                      | <b>Factor</b> |
|--------------------------------------------------------|---------------|
| Eggs                                                   | 0,91          |
| Meat / Calf                                            | 0,86          |
| Meat / beef                                            | 0,81          |
| Meat / pork, cooked                                    | 0,78          |
| Meat / pork, fried                                     | 0,74          |
| Meat / mix, Burger                                     | 0,93          |
| Meat / lamb                                            | 0,63          |
| Meat / offal                                           | 0,97          |
| Meat / sausages                                        | 0,78          |
| Meat / poultry, cooked                                 | 0,41          |
| Meat / poultry, fried                                  | 0,84          |
| Fish, cooked                                           | 0,5           |
| Fish, fried                                            | 0,72          |
| Soups                                                  | 12,05         |
| Soups, Meat                                            | 11,57         |
| Stew                                                   | 13,72         |
| Bouillon                                               | 39,3          |
| Sauces                                                 | 6,6           |
| Stew, legumes                                          | 3,04          |
| Stew vegetable/meat                                    | 0,95          |
| Vegetables, root                                       | 0,92          |
| Vegetables, leaves                                     | 1             |
| Vegetables, fruit (sweet pepper, cauliflower, pumpkin) | 0,98          |
| Potatoes, cooked                                       | 0,97          |
| Legumes, dry                                           | 3,1           |
| Legumes                                                | 1,04          |
| Potatoes, fried                                        | 0,68          |
| Cereals / rice, dry                                    | 3,68          |
| Pasta, dry                                             | 2,51          |
| Pasta, fresh                                           | 1,02          |
| Bread, cake, pizza                                     | 0,87          |

Yielding factors are based on Bognar et al. (2002). For calculation the actual consumption amount of prepared dishes, quantities of food items are in recipes were multiplied with respectively factor.

**Supplemental Table S2: Definition of food groups**

| <b>Food group</b>             | <b>Description</b>                                                                                                                 |
|-------------------------------|------------------------------------------------------------------------------------------------------------------------------------|
| Cooked vegetables             | Tomatoes, tomato sauce, sweet pepper, eggplant, spinach, carrots, asparagus, peas, carrot vegetable mix, leek, celery (all cooked) |
| Cabbage family                | Broccoli, cauliflower, red and white cabbage, kohlrabi (all cooked)                                                                |
| Legumes                       | Green peas, green beans, pea, bean, lentil stew                                                                                    |
| Cooked potatoes               | Salted potatoes, jacket potatoes, mashed potatoes, potato salad, dumplings                                                         |
| Mushrooms                     | Fresh mushrooms, mushroom dishes                                                                                                   |
| Sauce                         | Ketchup, brown and white sauce, salad dressing, sauce for vegetables                                                               |
| Poultry                       | Fried, grilled or roasted chicken or turkey                                                                                        |
| Meat except fish and poultry  | Pork, beef, hamburger, minced meat, liver, lamb, roast hare                                                                        |
| Animal fat except butter      | Animal fat used for food preparation                                                                                               |
| Dessert*                      | Pudding, sweet soufflé                                                                                                             |
| Cake, cookies*                | Cake, tart, cookies                                                                                                                |
| Confectionery, ice cream*     | Chocolate, candy bars, pralines, sugar, ice-cream, cereal bars                                                                     |
| Jam, honey, chocolate spread* | Jam, honey, chocolate spread, peanut butter, cashew butter, almond butter                                                          |
| Canned fruit                  | Canned fruit                                                                                                                       |
| Fruit juice                   | Citrus, apple, orange, grapefruit, grape, cherry, pineapple juice, multi-vitamin drinks, vegetable juices                          |
| Tea                           | Black tea, green tea, fruit and herbal teas                                                                                        |
| Muesli                        | Whole-grain breakfast cereal, muesli                                                                                               |
| Cornflakes                    | Cornflakes, other refined grain-based breakfast cereal                                                                             |
| Pasta*, rice                  | Cooked pasta, cooked rice, other cooked cereals (millet, bulgur, quinoa)                                                           |
| Pizza*                        | Pizza, quiche                                                                                                                      |
| Vegetarian dishes             | Vegetarian dishes                                                                                                                  |
| Garlic                        | Raw, fried or cooked garlic                                                                                                        |
| Whole meal bread              | Whole meal bread, dark and whole meal rolls                                                                                        |
| Other bread                   | Rye bread, wheat bread, mixed bread, pale rolls, crispbread, croissants                                                            |
| Olive oil                     | Olive oil used for food preparation                                                                                                |
| Fruits                        |                                                                                                                                    |
| Fresh fruits                  | All fresh fruits including avocado                                                                                                 |
| Dried fruits                  | Raisins, dates, figs, acai berry and all other dried fruits                                                                        |
| Raw vegetables                | Cucumber, carrot, sprouts, paprika, tomato, onion, radish, olives                                                                  |
| Other vegetables oils and fat | Vegetable fat used for food preparation (frying, dressing etc.) incl. coconut oil                                                  |
| Water                         | Tap water, mineral water                                                                                                           |
| Fish                          | Fish, canned fish, smoked fish                                                                                                     |
| Nuts                          | Nuts, Chia seed, pumpkin, sunflower, linseed                                                                                       |
| Chips, salt sticks            | Chips, salt sticks, cracker                                                                                                        |
| Fried potatoes                | French fries, potato fritters, fried potatoes                                                                                      |
| Beer                          | Beer                                                                                                                               |
| Spirits                       | Spirits                                                                                                                            |
| Wine                          | Wine, fruit wine, champagne                                                                                                        |
| Other alcoholic beverages     | Dessert wine, liqueur, aperitif                                                                                                    |
| Eggs                          | Boiled eggs, fried eggs, omelet                                                                                                    |
| Coffee                        | Coffee                                                                                                                             |
| Soup                          | Vegetable or potato stew, vegetable soup, meat or fish soup, broth, thickened soup                                                 |

| Food group                                       | Description                                                           |
|--------------------------------------------------|-----------------------------------------------------------------------|
| Processed meat                                   | Salami, cold-cut sausage, ham, fried sausage                          |
| Low-fat dairy products                           | Milk or yoghurt ( $\leq 1,5$ % fat), soured milk, low-fat curd cheese |
| High-fat dairy products                          | Other milk or yoghurt, curd cheese, cream                             |
| Low-fat cheese                                   | Low-fat cheese $\leq 45\%$                                            |
| High-fat cheese                                  | Other cheese                                                          |
| Butter                                           | Butter as spread and for food preparation                             |
| Margarine                                        | Margarine as spread and for food preparation                          |
| <i>Plant-based milk**</i>                        | Plant based milks                                                     |
| Soy milk                                         | Soy milk                                                              |
| Cereal based milk                                | Wheat, oat, spelt milk                                                |
| Nut based milk                                   | Almond, coconut, hazelnut milk                                        |
| Plant-based milk products (low fat)              | plant based cheese, yoghurt, cheese curd                              |
| Plant-based milk products (high fat)             | plant based cream                                                     |
| <i>Meat alternatives</i>                         | Tofu, seitan, tempeh, processed products e.g. sausages, burger        |
| <i>Vegetarian spread</i>                         | vegetables based spreads, hummus                                      |
| <i>Soft drink and other non-alcoholic drinks</i> | Soft drink and other non-alcoholic drinks                             |

Food groups used for analysis of 3-weighting protocols. \*Food groups combined vegan and omnivorous food items, but were captured separately for vegans and omnivores. \*\*Plant based milk included soy milk, nut-based milk and cereal based milk. Food groups in italic letters were added new for this study.

**Supplemental Table S3.** Intake of food groups of RBVD population

| Food group                         | Vegan                     | Omnivore                 | p      |
|------------------------------------|---------------------------|--------------------------|--------|
| Cooked vegetable                   | 115.83 (56.33-207.17)     | 71.67 (15.67-112.67)     | 0.008  |
| Cabbage family                     | 21.17 (0.00-48.17)        | 0.00 (0.00-21.50)        | 0.03   |
| Legumes                            | 58.50 (0.00-105.33)       | 0.00 (0.00-9.17)         | <.0001 |
| Cooked potatoes                    | 7.50 (0.00-81.84)         | 0.00 (0.00-76.50)        | 0.48   |
| Mushrooms                          | 0.00 (0.00-15.67)         | 0.00 0.00-0.00           | 0.16   |
| Sauce                              | 3.50 (0.00-12.33)         | 5.83 (0.00-30.50)        | 0.33   |
| Poultry                            | 0.00 (0.00-0.00)          | 14.67 (0.00-61.17)       | <.0001 |
| Meat except fish and poultry       | 0.00 (0.00-0.00)          | 18.33 (0.00-85.00)       | <.0001 |
| Animal fat except butter           | 0.00 (0.00-0.00)          | 0.00 (0.00-0.00)         | 0.15   |
| Dessert*                           | 0.00 (0.00-0.00)          | 0.00 (0.00-0.00)         | 0.67   |
| Cake, cookies*                     | 0.00 (0.00-26.84)         | 19.33 (0.00-63.83)       | 0.12   |
| Confectionary, ice cream*          | 29.67 (7.50-74.67)        | 29.33 (9.00-55.33)       | 0.90   |
| Jam, honey, chocolate spread*      | 0.00 (0.00-11.67)         | 2.17 (0.00-8.83)         | 0.63   |
| Canned fruit                       | 0.00 (0.00-0.00)          | 0.00 (0.00-0.00)         | 0.98   |
| Fruit juice                        | 18.83 (0.00-162.17)       | 78.34 (0.00-205.17)      | 0.83   |
| Tea                                | 266.50 (0.00-903.33)      | 0.00 (0.00-300.00)       | 0.04   |
| Muesli                             | 27.67 (0.00-56.50)        | 0.00 (0.00-28.17)        | 0.11   |
| Cornflakes                         | 0.00 (0.00-0.00)          | 0.00 (0.00-0.00)         | 0.30   |
| Pasta*, rice                       | 107.00 (48.33-203.00)     | 56.17 (0.00-126.00)      | 0.05   |
| Pizza*                             | 0.00 (0.00-0.00)          | 0.00 (0.00-0.00)         | 0.88   |
| Vegetarian dishes                  | 0.00 (0.00-0.00)          | 0.00 (0.00-0.00)         | 0.25   |
| Garlic                             | 0.00 (0.00-1.67)          | 0.00 (0.00-0.33)         | 0.07   |
| Whole grain bread                  | 4.00 (0.00-39.17)         | 0.00 (0.00-19.00)        | 0.12   |
| Other bread                        | 44.50 (9.00-106.67)       | 96.33 (58.17-149.33)     | <.01   |
| Olive oil                          | 2.17 (0.00-7.84)          | 4.50 (0.00-10.17)        | 0.54   |
| Fresh fruit                        | 185.50 (94.67-344.83)     | 152.33 (62.17-215.17)    | 0.14   |
| Raw vegetables                     | 145.67 (77.33-327.67)     | 76.67 (43.67-148.67)     | 0.01   |
| Vegetables oils and fat            | 12.67 (4.83-27.67)        | 1.50 (0.00-8.00)         | <.0001 |
| Water                              | 1558.83 (1006.50-2089.00) | 1128.50 (595.50-1866.33) | 0.05   |
| Fish                               | 0.00 (0.00-0.00)          | 0.00 (0.00-38.83)        | 0.005  |
| Nuts and Seeds                     | 18.50 (2.69-41.17)        | 1.17 (0.00-18.00)        | 0.01   |
| Chips, salt sticks                 | 0.00 (0.00-0.00)          | 0.00 (0.00-0.00)         | 1.00   |
| Fried potatoes                     | 0.00 (0.00-5.50)          | 0.00 (0.00-0.00)         | 0.54   |
| Beer                               | 0.00 (0.00-0.00)          | 0.00 (0.00-25.00)        | 0.62   |
| Spirits                            | 0.00 (0.00-0.00)          | 0.00 (0.00-0.00)         | 0.15   |
| Wine                               | 0.00 (0.00-0.00)          | 0.00 (0.00-41.34)        | 0.01   |
| Other alcoholic beverages          | 0.00 (0.00-0.00)          | 0.00 (0.00-0.00)         | 0.32   |
| Eggs                               | 0.00 (0.00-0.00)          | 17.17 (0.00-39.50)       | <.0001 |
| Coffee                             | 81.83 (0.00-285.33)       | 172.00 (49.50-344.33)    | 0.06   |
| Soup                               | 0.00 (0.00-2.67)          | 0.00 (0.00-32.33)        | 0.54   |
| Processed meat                     | 0.00 (0.00-0.00)          | 31.50 (3.17-76.83)       | <.0001 |
| Low-dairy products                 | 0.00 (0.00-0.00)          | 238.67 (121.33-427.00)   | <.0001 |
| High-dairy products                | 0.00 (0.00-0.00)          | 0.00 (0.00-53.33)        | <.0001 |
| Low fat cheese                     | 0.00 (0.00-0.00)          | 13.17 (0.00-33.50)       | <.0001 |
| High fat cheese                    | 0.00 (0.00-0.00)          | 4.00 (0.00-20.00)        | <.0001 |
| Butter                             | 0.00 (0.00-0.00)          | 14.67 (2.17-21.50)       | <.0001 |
| Margarine                          | 0.00 (0.00-2.50)          | 0.00 (0.00-0.00)         | 0.20   |
| Plant-based milk                   | 184.50 (76.00-304.67)     | 0.00 (0.00-0.00)         | <.0001 |
| Plant-based milk products low fat  | 29.50 (0.00-74.84)        | 0.00 (0.00-0.00)         | <.0001 |
| Plant-based milk products high fat | 0.00 (0.00-13.84)         | 0.00 (0.00-0.00)         | <.001  |
| Meat alternatives                  | 64.00 (11.34-120.33)      | 0.00 (0.00-0.00)         | <.0001 |
| Savory spread plant-based          | 10.67 (0.00-30.00)        | 0.00 (0.00-0.00)         | <.0001 |
| Soft drinks                        | 0.00 (0.00-83.83)         | 0.00 (0.00-161.84)       | 0.84   |

Median (Q1-Q3) intake of food groups of RBVD population (g/d), based on weighing protocols. Statistical test: Mann Whitney-U Test. \*Vegan alternative for this food groups was considered in results, e.g. egg-free pasta, vegan ice-cream or cakes.

**Supplemental S4: Factor loadings of all 53 food groups in first dietary pattern score**

| <b>Food group</b>                   | <b>Factor loading</b> |
|-------------------------------------|-----------------------|
| Processed meat                      | 0,26*                 |
| Fried potatoes                      | 0,25*                 |
| Bread, other                        | 0,25*                 |
| Margarine                           | 0,24*                 |
| Fish                                | 0,23*                 |
| Coffee                              | 0,22*                 |
| Cheese, low fat                     | 0,20                  |
| Sauce                               | 0,19                  |
| Fruit juice                         | 0,19                  |
| Dairy, low fat                      | 0,18                  |
| Butter                              | 0,15                  |
| Confectionary                       | 0,15                  |
| Poultry                             | 0,15                  |
| Dairy, high fat                     | 0,14                  |
| Beer                                | 0,12                  |
| Eggs                                | 0,12                  |
| Animal fat                          | 0,12                  |
| Meat                                | 0,11                  |
| Wine                                | 0,10                  |
| Cheese, high fat                    | 0,10                  |
| Chips, salt sticks                  | 0,10                  |
| Spirits                             | 0,10                  |
| Soup                                | 0,08                  |
| Soft drinks                         | 0,08                  |
| Cake, Cookies                       | 0,07                  |
| Vegetarian dishes                   | 0,07                  |
| Cornflakes                          | 0,07                  |
| Cooked potatoes                     | 0,02                  |
| Garlic                              | 0,02                  |
| Olive oil                           | -0,02                 |
| Plant based milk products, low fat  | -0,03                 |
| Pizza                               | -0,03                 |
| Alcoholic beverages                 | -0,03                 |
| Dessert                             | -0,05                 |
| Jam, honey                          | -0,05                 |
| Whole meal bread                    | -0,06                 |
| Canned fruit                        | -0,06                 |
| Cooked vegetables                   | -0,08                 |
| Meat alternatives                   | -0,09                 |
| Raw vegetables                      | -0,10                 |
| Fresh fruit                         | -0,10                 |
| Plant based milk products, high fat | -0,11                 |
| Mushrooms                           | -0,11                 |
| Vegetable oil / fat                 | -0,11                 |
| Cabbage family                      | -0,11                 |
| Pasta, rice                         | -0,12                 |
| Water                               | -0,12                 |
| Legumes                             | -0,13                 |
| Tea                                 | -0,13                 |
| Plant based milk                    | -0,15                 |
| Savory spreads                      | -0,17                 |
| Nuts, seeds                         | -0,18                 |
| Muesli                              | -0,23*                |

Factor loadings are correlation between food groups and the dietary pattern score. Food groups with factor loadings  $> 0.2$  contributed to the simplified dietary pattern (marked with \*)
